# Supplementary material for: Lipid ROS- and Iron-Dependent Ferroptotic Cell Death in Unicellular Algae Chlamydomonas reinhardtii
Source: MDPI journal article supplement (doi:10.3390/cells12040553), 2023-02-08
Supplement: s1 [file s1]

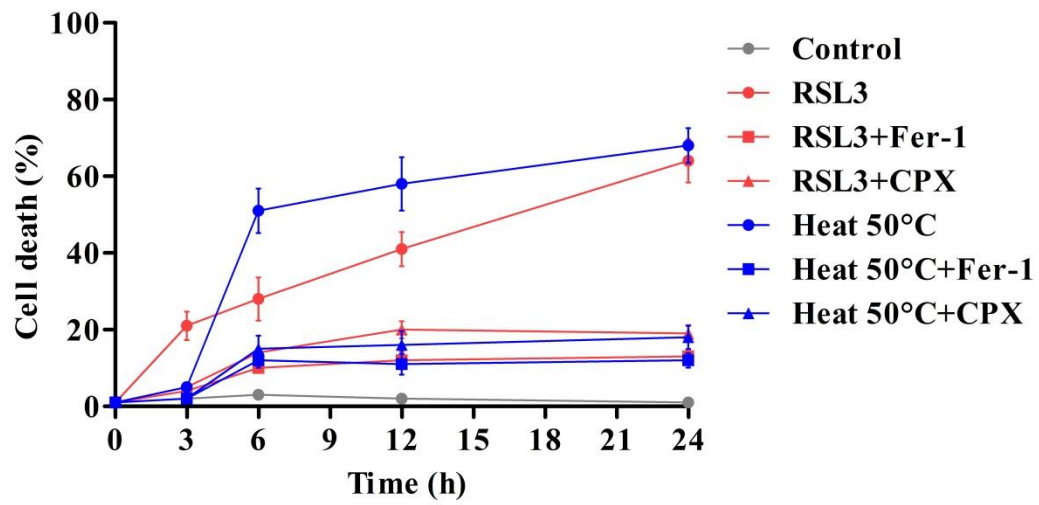

**Figure S1.** Cell death kinetics of *Chlamydomonas* cells subjected to RSL3 and heat (50 °C) treatment with or without ferroptosis inhibitors. The data are represented as mean  $\pm$  SD (n=3).

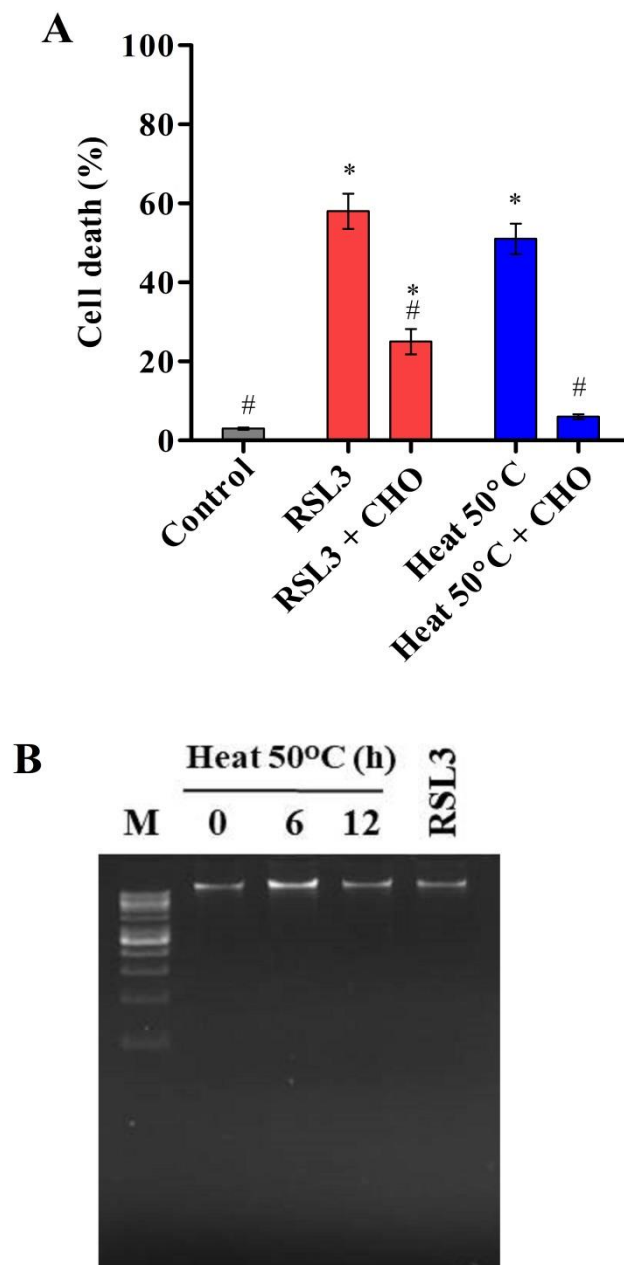

**Figure S2.** The effect of heat shock and RSL3 treatment on caspase-like activity (A) and DNA fragmentation (B) in *Chlamydomonas* cells. 10kb DNA marker (M) was used. The data are represented as mean  $\pm$  SD (n=3). \* indicates significant differences with respect to untreated control. # indicates significant differences with respect to RSL3 or Heat 50°C treatment (p<0.05)

**Table S1.** List of RT-qPCR primers used in this study

| Primers | Sequence (5'-3')     | Length (bp) | Annealing Temperature (°C) |
|---------|----------------------|-------------|----------------------------|
| GPX5-F  | GCGGTCGCCAATAACCAAT  | 19          | 60                         |
| GPX5-R  | AAGGGCTGTCCCGAAAGC   | 18          |                            |
| HO-1-F  | CTGCCGACATTGCCTGGAT  | 18          | 60                         |
| HO-1-R  | CGCCTCTTGCTTTATGCCTC | 20          |                            |
| CBLP-F  | CTTCTCGCCCATGACCAC   | 18          | 60                         |
| CBLP-R  | CCCACCAGGTTGTTCTTCAG | 20          |                            |
